# Supplementary material
Source: PubMed Central journal article supplement (PMC2937499)
Supplement: supp_76_18_6257__3.pdf [file supp_76_18_6257__3.pdf]

**Table S1:** Primers used in this study with restriction sites shown underlined. The ribosome binding sequences (RBS) are shown as bold letters

| Primer | Sequence                                                                                | Purpose            |
|--------|-----------------------------------------------------------------------------------------|--------------------|
| BlaF   | AC <u>ATGCAT</u> GCATGTGAATTCGACGAAAGGGCCTCGTGATACGCCT ( <i>SphI</i> )                  | Cloning            |
| BlaR   | CCGCATATGACTC TTCCTTTTTCAATATTATTGAAG-3' ( <i>NdeI</i> )                                | Cloning            |
| AGMf   | AG <u>CATATG</u> <b>TGAGGAGGATGAACGACGC</b> ATGTCAATTGAACAAACATT ( <i>NdeI</i> )        | Cloning            |
| AGMr   | AC <u>GGATCC</u> CTATTTAACTAATTCAGATACTGC ( <i>BamHI</i> )                              | Cloning;<br>RT-PCR |
| NAGf   | G <u>AGGATCCT</u> <b>TGAGGAGGATGAACGACGC</b> ATGACTGAGACTAGCATTAGTG<br>( <i>BamHI</i> ) | Cloning;<br>RT-PCR |
| NAGr   | GGA <u>AGCTT</u> CTACTTATGATAGGCAGCA ( <i>HindIII</i> )                                 | Cloning            |
| UAPf   | GCA <u>AGCTT</u> <b>TGAGGAGGATGAACGACGC</b> ATGACAGTTAAATCACAAC ( <i>HindIII</i> )      | Cloning            |
| UAPr   | AT <u>GCGGCCG</u> CTTAAATAATATCGCCATTTT ( <i>NotI</i> )                                 | Cloning            |
| PetF   | TAGGTGGT <u>GCTCGAG</u> TGCGGCCGCAAG( <i>XhoI</i> )                                     | Cloning            |
| PetR   | AATGGT <u>G</u> CATGCAAGGAGATGGC ( <i>SphI</i> )                                        | Cloning            |
| PucF   | GG <u>AGCATG</u> CTTGGCGTAATCATGGTCATA ( <i>SphI</i> )                                  | Cloning            |
| PucR   | T <u>GCTCGAG</u> TATGGTGCACCTCAGTACAA ( <i>XhoI</i> )                                   | Cloning            |
| TetF   | GCTTAGTACTCATGTTTGACAGCTTATCATC( <i>Scal</i> )                                          | Cloning            |
| TetR   | AATCACCGGTCCGGCTTCCATTCAGGTCGAGG( <i>AgeI</i> )                                         | Cloning            |
| NAGF1  | CTATGTTGCCTAACTATAATGTCTCC                                                              | RT-PCR             |
| NAGR1  | GCACAACCTTGTCATGTATATCATCA                                                              | RT-PCR             |
| UAPF1  | ATGGTAATGGTGGATTATATAAGGC                                                               | RT-PCR             |
| UAPR1  | ATCCTTGATTATCAATAACTCCACC                                                               | RT-PCR             |

**Table S2:** Plasmids used in this study.

| Plasmid (size)        | relevant characteristics                                                                           | reference               |
|-----------------------|----------------------------------------------------------------------------------------------------|-------------------------|
| TOPO-bluntII (3.5 kb) | Kan <sup>R</sup> ; broad range vector                                                              | Invitrogen <sup>1</sup> |
| pUC19 (2.9 kb)        | Amp <sup>R</sup> , broad range vector                                                              | Invitrogen <sup>1</sup> |
| pBBR122 (5.3 kb)      | Cm <sup>R</sup> ; Kan <sup>R</sup> ; broad range vector                                            | MoBiTec <sup>2</sup>    |
| pBBR-Tet (6.4 kb)     | Tet <sup>R</sup> , Cm <sup>R</sup> ; Kan <sup>R</sup>                                              | this study              |
| pUC-MCS (2.9 kb)      | Amp <sup>R</sup> ; contains pET-30 MCS sequence at <i>SphI</i> and <i>XhoI</i>                     | this study              |
| pUC-bla (2.9 kb)      | Amp <sup>R</sup> ; contains <i>bla</i> promoter sequence at <i>SphI</i> and <i>NdeI</i> in PET-MCS | this study              |
| pUC-bla-A (4.5 kb)    | Amp <sup>R</sup> ; contains AGM1 sequence at <i>NdeI</i> and <i>BamHI</i> in PET-MCS               | this study              |
| pUC-bla-A-N (5.9 kb)  | Amp <sup>R</sup> ; contains NAG5 sequence at <i>BamHI-HindIII</i> in PET-MCS                       | this study              |
| pUC-GlcNAc (7.3 kb)   | Amp <sup>R</sup> ; contains UAP1 sequence at <i>HindIII-NotI</i> in PET-MCS                        | this study              |
| pBBR-GlcNAc (10.9 kb) | Kan <sup>R</sup> ; Tet <sup>R</sup> ; contains whole operon at <i>SphI</i> and <i>PsPOMI</i>       | this study              |

1 – Carlsbad, CA

2 – Goettingen, Germany

**Table S3:** Mass spectrometer main working parameters for glucose and GlcNac quantitative analysis in acid hydolysates

| Parameter                            | value    |
|--------------------------------------|----------|
| Declustering Potential (DP, V)       | -30      |
| Entrance potential (EP, V)           | -10      |
| Collison Energy (CE, V)              | -11      |
| Collison Cell exit Potential (CXP,V) | -2       |
| Curtain Gas (CUR)                    | 11       |
| Collision Gas (CAD)                  | medium   |
| Ion Spray Voltage (IS, V)            | -2600    |
| Temperature (°C)                     | 350      |
| Ion Sourse Gas 1 (GS1)               | 20       |
| Polarity of analysis                 | negative |
| Ion transition for GlnNac, m/z       | 220/119  |
| Ion transition for Glucose, m/z      | 179/89   |

**Table S4:** Mass spectrometer main working parameters for glucose and GlcNac analysis in enzyme hydrolysates

| Parameter                           | value    |
|-------------------------------------|----------|
| Declustering Potential (DP, V)      | -90      |
| Entrance potential (EP, V)          | -4       |
| Curtain Gas (CUR)                   | 10       |
| Ion Spray Voltage (IS, V)           | -4500    |
| Temperature (°C)                    | 200      |
| Ion Source Gas 1 (GS1)              | 10       |
| Polarity of analysis                | negative |
| Ion for GlcNac, m/z                 | 220      |
| Ion for Glucose, m/z                | 179      |
| Ion for Glucose-GlcNac, m/z         | 382      |
| Ion for Glucose-GlcNac-Glucose, m/z | 544      |
