# Supplementary material
Source: PubMed Central journal article supplement (PMC2937499)

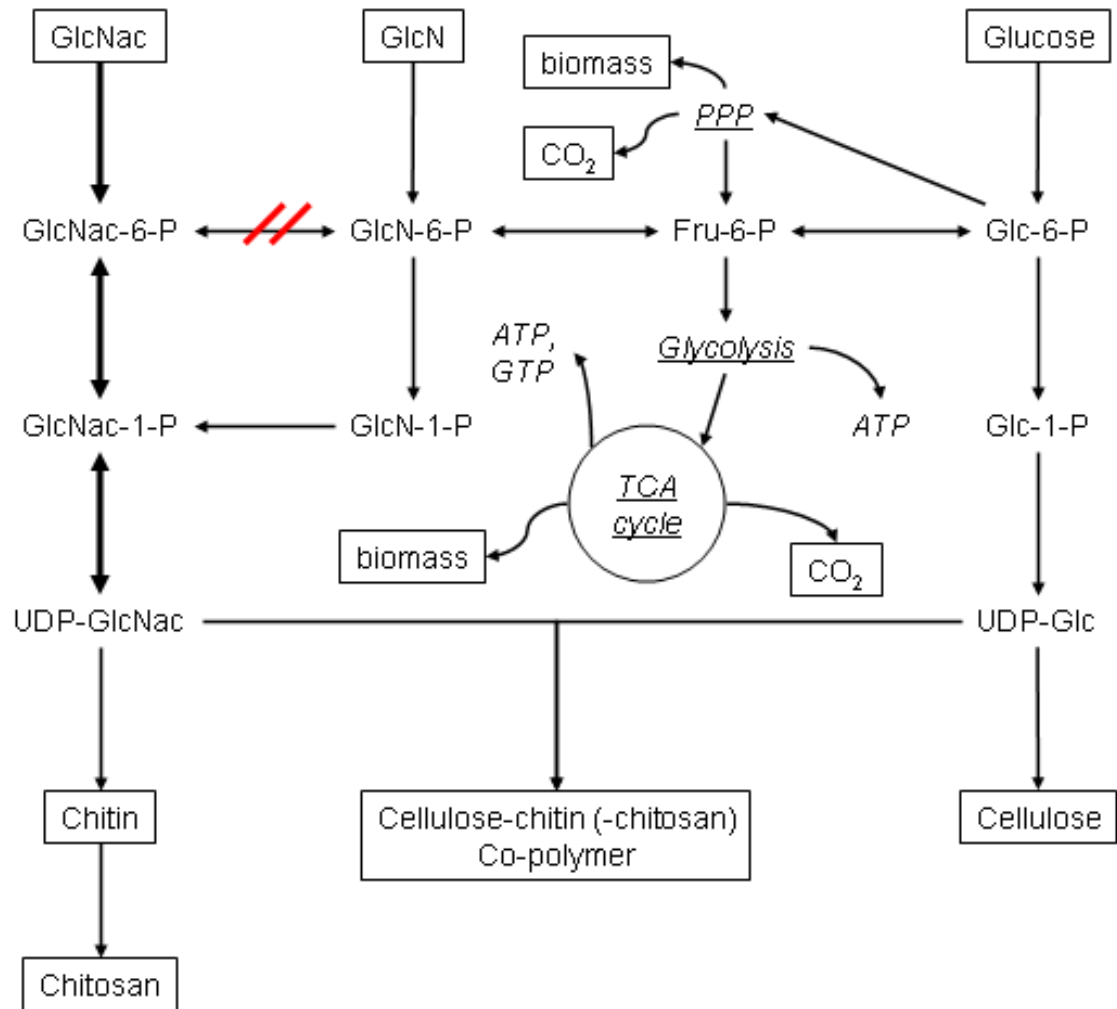

Figure S1

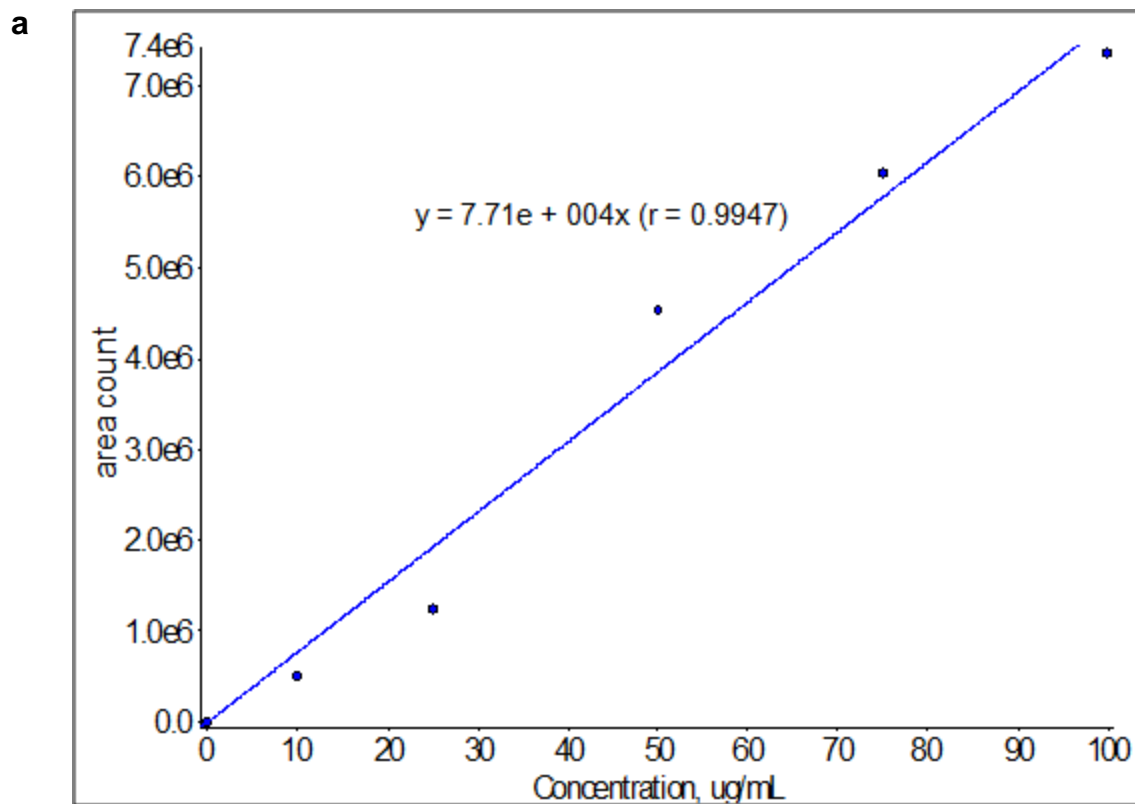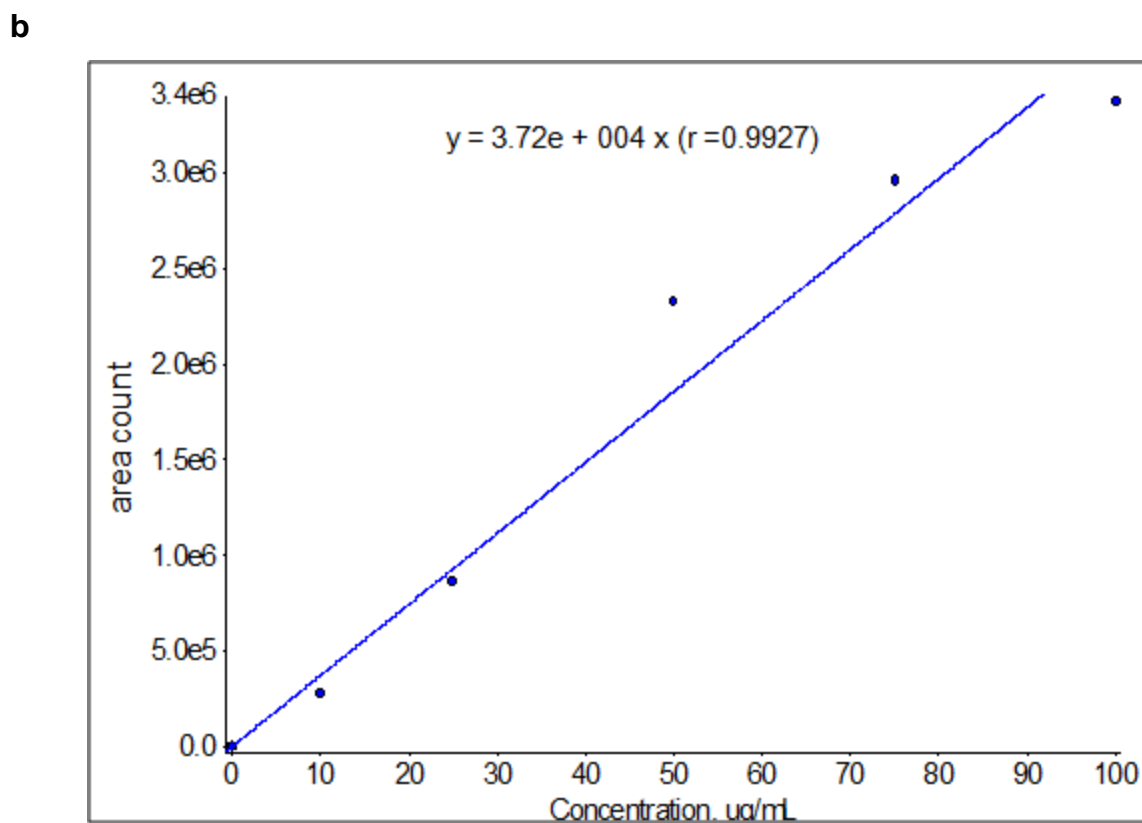**Figure S2**

a

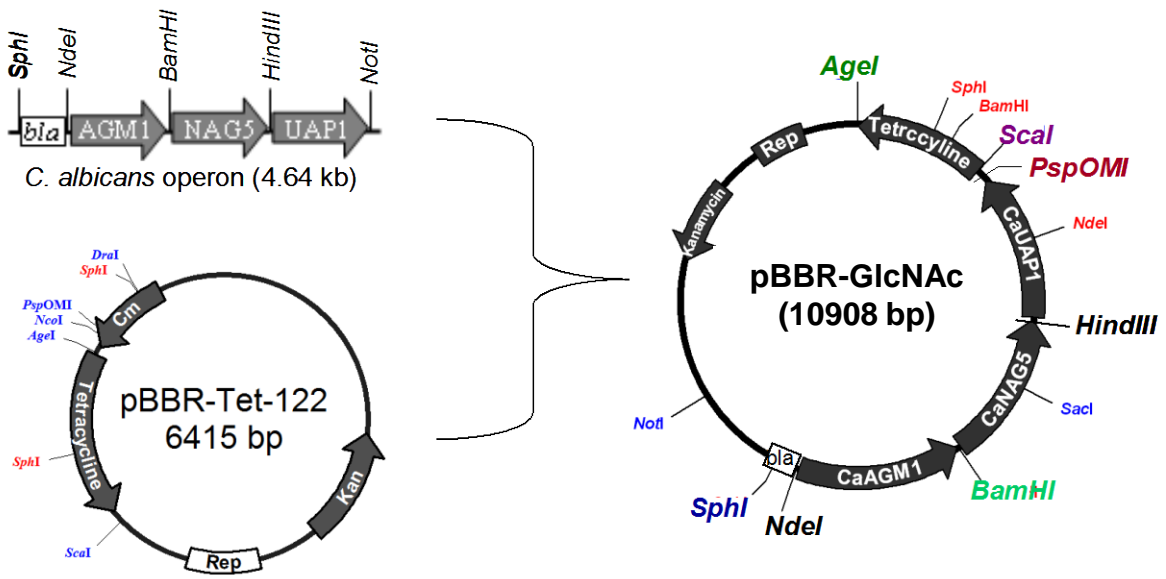

b

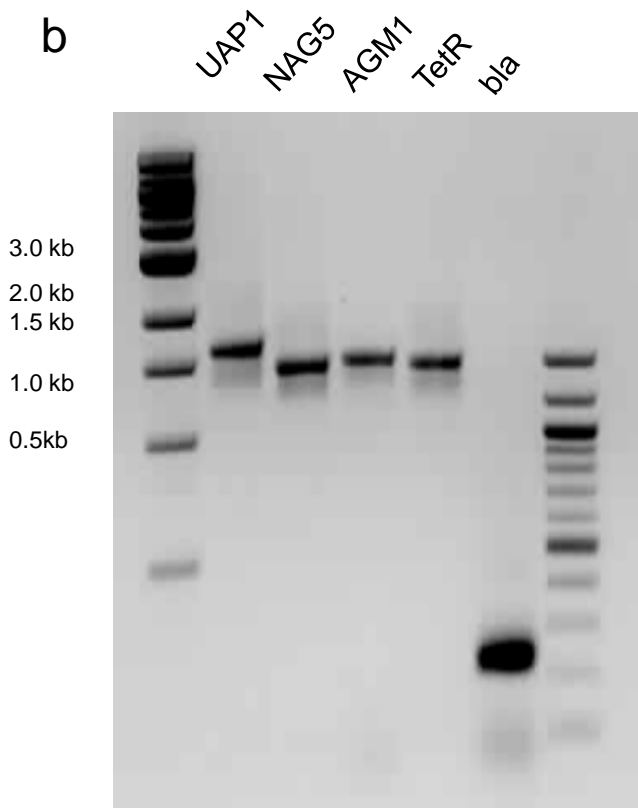

c

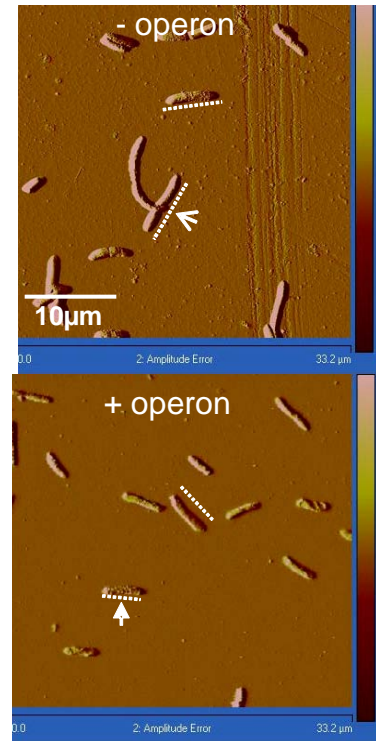

Figure S3

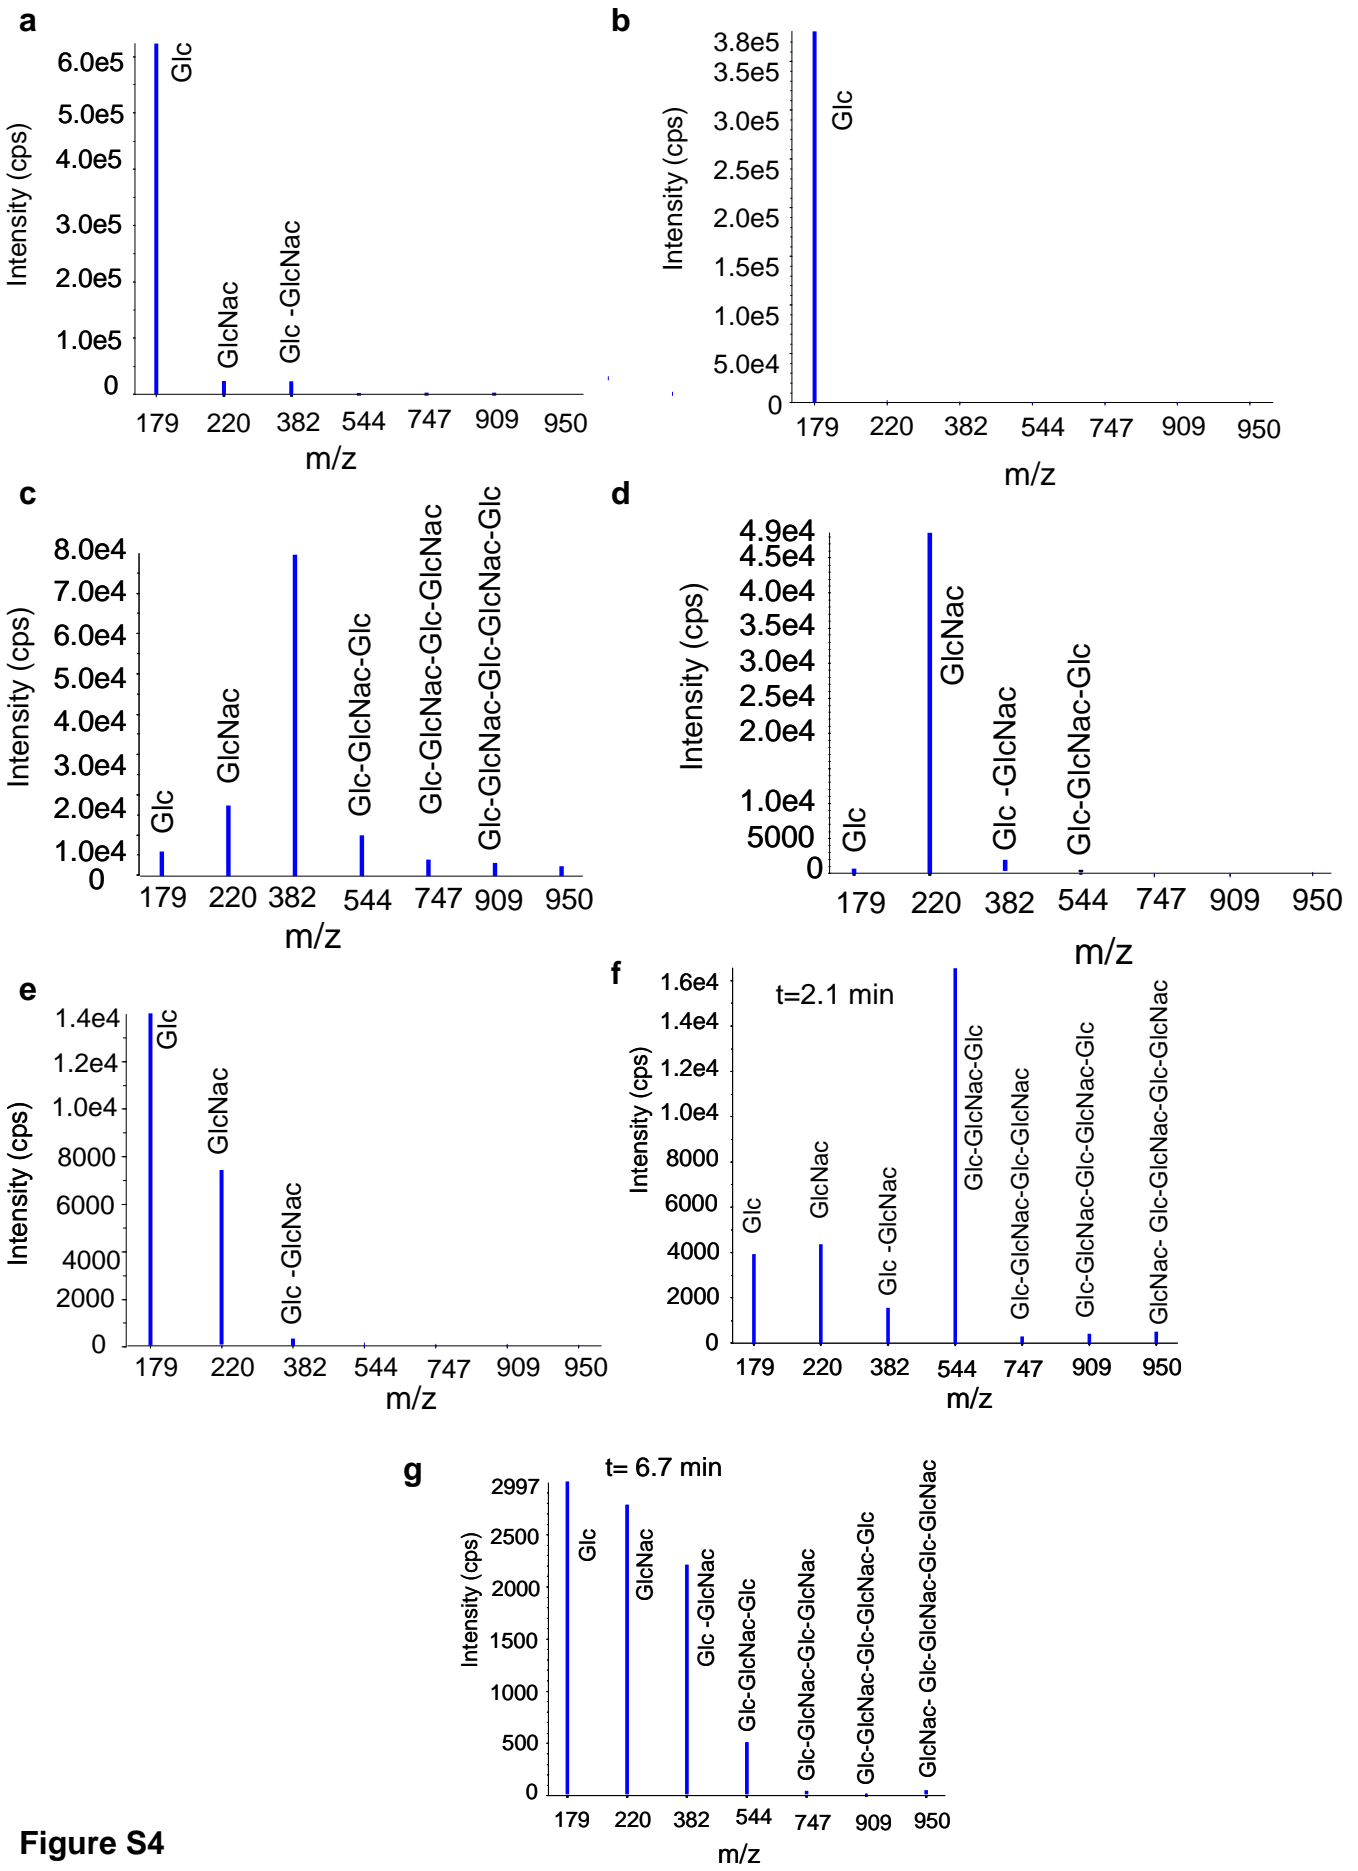

Figure S4

Supplement: supp_76_18_6257__2.pdf [file supp_76_18_6257__2.pdf]
